1            **Pangenome of white lupin provides insights into the**  
2                                   **diversity of the species**

3

4   Bárbara Hufnagel<sup>1\*</sup>, [barbara.hufnagel@supagro.fr](mailto:barbara.hufnagel@supagro.fr)

5   Alexandre Soriano<sup>1</sup>, [alexandre.soriano@supagro.fr](mailto:alexandre.soriano@supagro.fr)

6   Jemma Taylor<sup>2</sup>, [j.taylor2@kew.org](mailto:j.taylor2@kew.org)

7   Fanchon Divol<sup>1</sup>, [fanchon.divol@supagro.fr](mailto:fanchon.divol@supagro.fr)

8   Magdalena Kroc<sup>3</sup>, [mkro@igr.poznan.pl](mailto:mkro@igr.poznan.pl)

9   Heather Sanders<sup>4</sup>, [heather.sanders@secure-harvests.com](mailto:heather.sanders@secure-harvests.com)

10   Likawent Yeheyis<sup>5</sup>, [likawenty@yahoo.com](mailto:likawenty@yahoo.com)

11   Matthew Nelson<sup>2,6</sup>, [matthew.nelson@csiro.au](mailto:matthew.nelson@csiro.au)

12   Benjamin Péret<sup>1\*</sup>, [benjamin.peret@supagro.fr](mailto:benjamin.peret@supagro.fr)

13

14   1     *BPMP, Univ Montpellier, CNRS, INRAE, Institut Agro, Montpellier, France*

15   2     *Royal Botanic Gardens, Kew, UK*

16   3     *Institute of Plant Genetics Polish Academy of Sciences, Poznan, Poland*

17   4     *Secure Harvests, Bradford on Avon, UK*

18   5     *Amhara Agricultural Research Institute, Bahir Dar, Ethiopia*

19   6     *CSIRO, Perth, Australia*

20   \*     *Corresponding authors*

21

22

23

24   **ABSTRACT**

25 **Background:** White lupin is an old crop with renewed interest due to its seed high  
26 protein content and high nutritional value. Despite a long domestication history in the  
27 Mediterranean basin, modern breeding efforts have been fairly scarce. Recent  
28 sequencing of its genome has provided tools for further description of genetic  
29 resources but detailed characterization is still missing.

30 **Results:** Here, we report the genome sequencing of several accessions that were  
31 used to establish a white lupin pangenome. We defined core genes that are present  
32 in all individuals and variable genes that are absent in some and may represent a  
33 gene pool for stress adaptation. We believe that the identification of novel genes,  
34 together with a more comprehensive reference sequence, represents a significant  
35 improvement of the white lupin genetic resources. As an example, we used this  
36 pangenome to identify selection footprints and to provide a candidate gene for one of  
37 the main QTLs associated with late flowering in Ethiopian lupin types. A 686  
38 nucleotide deletion was identified in exon 3 of the *LaFTa1* (*Lupinus albus Flowering*  
39 *Time a1*) gene that suggests a molecular origin for this trait of importance, defining  
40 the need for vernalization in some lupins.

41 **Conclusions:** The white lupin pangenome provides a novel genetic resource to  
42 better understand how domestication has shaped the genomic variability amongst  
43 this crop. It will be of major importance for breeders to select new breeding traits and  
44 incorporate them into new, more efficient and robust cultivars in order to face a  
45 growing demand for plant protein sources, notably in Europe.

46

47 **Keywords:** White lupin, pangenome, flowering time, domestication, plant diversity.

48 **BACKGROUND**

49 White lupin (*Lupinus albus* L.) is a pulse whose domestication started about  
50 3000 - 4000 years ago in the Mediterranean region [1]. It is cultivated for its seeds  
51 that contain high levels of proteins and are used both for food and feed [2]. The wild  
52 forms of the species can only be found in the Balkan region and evidence of its  
53 earliest use as a green manure and grain crop come from that same region [3]. Early  
54 Greek farmers selected larger seeds and white flowers, and presumably soft-  
55 seededness (water permeable seeds) was the earliest domestication trait. Greek and  
56 Roman literature suggests that seed indehiscence (*i.e.* resistance to pod shattering)  
57 had not yet been incorporated by the first century A.D. [4].

58 Wild collections and landraces of white lupin contain high levels of  
59 quinolizidine alkaloids that accumulate in the seed, resulting in a bitter taste and  
60 possible toxicity. Lysine-derived alkaloids are characteristic of the Genistoids [5–7], a  
61 monophyletic basal clade belonging to the Fabaceae family. Traditionally these bitter  
62 compounds are removed from white lupin seeds by soaking in water, a practice that  
63 is still carried out today across the Mediterranean and Nile regions [1]. However, this  
64 is uneconomic on a broad-scale, which motivated the identification of low alkaloid  
65 mutants in Germany in the 1930s, aided by advances in chemistry [4]. Modern  
66 cultivars of white lupin incorporate low alkaloid genes, hence the term ‘sweet’ lupins.

67 Breeding efforts have rarely been intensive or sustained over long periods. As  
68 a result, white lupin yields remain low and highly variable, in comparison to similar  
69 pulses like soybean for which important breeding efforts have been made  
70 internationally. Although white lupin cultivation represents a promising crop for  
71 Europe, in a political context aiming towards plant protein independence, the lack of  
72 well characterised genetic resources has been hampering a fast deployment of white  
73 lupin as an alternative crop to soybean imports. The recent sequencing of white lupin

74 genome [8,9] demonstrated a resurgence of interest for this “old” crop. We believe  
75 that white lupin intragenomic diversity might reflect the early traces of its slow and  
76 sporadic domestication history.

77 Here we report a pangenome for white lupin that reveals important aspects of  
78 the species diversity, single nucleotide polymorphisms (SNPs) and gene presence–  
79 absence variations (PAVs). We construct a species pangenome consisting of ‘core’  
80 genes that are present in all individuals and ‘variable’ (soft-core or shell) genes that  
81 are absent in some individuals [10,11]. Building on this comprehensive dataset, we  
82 were able to identify a deletion in the QTL region associated with late flowering in  
83 Ethiopian white lupins. The deleted gene is a homolog of the FT (Flowering Time)  
84 gene, suggesting that this deletion is at the origin of the need for vernalization in  
85 these accessions. Our analyses provide new perspectives on white lupin intra-  
86 species diversity and domestication history.

87

## 88 **RESULTS**

### 89 ***De novo* assembly and pangenome construction**

90 We gathered a set of 39 white lupin accessions, including 25 modern cultivars,  
91 10 landraces and 4 wild accessions from 17 countries (Supplementary Table 1).  
92 Genome sequence of 15 out of these accessions was available from a previous  
93 report [8], whereas 24 accessions have been sequenced within this study to obtain  
94 broader species representation. Short-read sequences have been assembled *de*  
95 *novo* for each accession (28.5x mean depth, 150 bp pair-end, Supplementary Table  
96 2).

97 The *de novo* assembly for each accession produced a total of 14.9 Gb of  
98 contigs longer than 500 base pairs (bp) with an N50 value (the minimum contig

99 length needed to cover 50% of the assembly) of 24,475 bp. These *de novo*  
100 assemblies showed a mean complete BUSCOs score of 96.3%, a value similar to the  
101 AMIGA reference genome (97.7%). Assembly completeness assessed by BUSCO  
102 was higher than 91.7%, for all accessions and in case of three accessions (Kiev,  
103 P27174 and Magnus) the score was similar to the reference genome (Fig. 1a).

104 The pangenome was built using the iterative mapping and assembly  
105 approach, in a similar strategy used to generate the *Brassica oleracea* [10] and  
106 tomato [12] pangenomes. The assembly of *L. albus* reference genome based on  
107 AMIGA accession is 450,972,408 bp size with 38,258 predicted protein-coding genes  
108 [8]. All *de novo* assembled contigs were compared with the reference genome to  
109 identify previously unknown sequences. A total of 270 Mb of nonreference sequence  
110 with identity <90% to the reference genome was obtained. After pangenome  
111 construction and removal of contaminants and overly repetitive sequences, we  
112 assembled an additional 3,663 scaffolds, with a length greater than 2,000 bp, for a  
113 total length of 11,733,253 bp. Using a threshold of a minimum 10x coverage, we  
114 identified 178 newly predicted protein-coding genes, among which 61 could be  
115 annotated with gene ontology (GO) terms or Pfam domains (Supplementary Dataset  
116 1). The white lupin pangenome, including reference and nonreference genome  
117 sequences, had a total size of 462,705,661 bp and contained 38,446 protein-coding  
118 genes. The total size of the constructed pangenome is compatible with nuclear DNA  
119 content estimates based on flow cytometry [13] which suggests that it represents the  
120 complete genome sequence of the species. We added to the White Lupin Genome  
121 portal ([www.whitelupin.fr](http://www.whitelupin.fr)) dedicated user-friendly tools for the exploitation of the  
122 pangenome, such as a BLAST tool for individual accessions, download of specific  
123 regions of accessions and a genome browser mapping all the variants.

124

## 125 **Core and variable genes**

126       The presence or absence of each protein-coding gene was predicted for each  
127 of the 39 accessions based on the mapping of reads from each accession to the  
128 pangenome assembly using SGSGeneLoss [14]. Likewise to other plants  
129 pangenomes [10,12,15–18], we categorized genes in the white lupin pangenome  
130 according to their presence frequencies, using Markov clustering in the  
131 GET\_HOMOLOGUES-EST pipeline [19]. The majority of the genes, 32,068 (78.5%),  
132 are core genes shared by all the 39 accessions; 6,046 soft-core (14.8%), being  
133 absent in at least one accession; and 8,776 (21.4%) are shell, present in 2-38  
134 accessions (Fig. 1b). The size of the pangenome expanded with each additional  
135 accession to 38,443 genes, and extrapolation leads to a predicted pangenome size  
136 of 40,844 +/-289 genes (Figure 1b).

137

## 138 **Single-nucleotide polymorphism detection and annotation**

139       To capture and broadly characterize white lupin diversity we applied a strict  
140 SNP identification pipeline, using GATK 4.1.0.0. A total of 9,442,876 raw SNPs were  
141 identified, 806,740 of which were recognized in the newly assembled pangenome  
142 scaffolds. After filtering, 3,527,872 SNPs were retained in the 39 accessions,  
143 corresponding to a rate of 1 variant every 127 bp (Supplementary Figure S1). The  
144 majority (85.8%) of the high-quality variants are SNPs (3,027,761) and the other  
145 501,111 variants detected are insertions and deletions (Fig. 1c – blue). Most variants  
146 (59.3%) are distributed on intergenic regions, 7.1% are within introns and only 1.9%  
147 (96,576) of the variants are located in exons (Fig. 1c – red). From the variants  
148 present in the CDS region 4,725 showed potentially large effects by causing start

149 codon changes, premature stop codons or elongated transcripts, and 50,478 are  
150 considered to produce a moderate effect by leading to codon changes in annotated  
151 genes. The frequency of these missense SNPs in the core gene set was one each  
152 4.26 kb, which was lower than the variable gene set, with a rate of one for 1.84 kb.  
153 The rest of the variants lead to synonymous changes in proteins (low effect variants)  
154 or modifiers, causing changes outside the coding regions (Fig. 1c – green).  
155 Collectively, this comprehensive dataset of the genome variation of white lupin  
156 provides a resource for biology and breeding of this species.

157

## 158 **Population structure**

159 To establish a phylogenetic benchmark for the analysis of the pangenome, we  
160 built a consensus maximum likelihood tree (Fig. 2a) to infer the phylogenetic  
161 relationships for these *L. albus* accessions using the complete set of 3.5 M SNPs  
162 described above. This phylogenetic tree clustering supported six clades, which  
163 exhibited distinctive geographic origin and distinctive botanical features. In the Type  
164 1 are grouped accessions with early flowering traits, including the Chilean  
165 agroecotypes, and German and French accessions used in breeding programs. This  
166 group also included the widely used cv. Kiev Mutant, which was generated by  
167 mutagenesis techniques with the intention to induce early flowering, and the  
168 accessions that are derived forms of it (Primorsky and Dieta, [3]). Type 2 is also  
169 composed by accessions with early flowering, a number of which have characteristics  
170 of Polish agroecotypes described by Kurlovich [3] and are adapted to grow in Eastern  
171 Europe. One of the most representative accessions of this group is the cv. Kalina [3],  
172 an old cultivar created in the Polish breeding program sharing similar genetic  
173 background with the broadly used cultivar Start. Interestingly, Start is reported to

174 carry different early-flowering genes than Kiev Mutant [20]. Type 2 also comprises  
175 two landraces with from Syria and Israel/Palestine. Type 3 encompasses autumn-  
176 sown genotypes with strong vernalisation requirement and dwarf phenotype from the  
177 French breeding program, and the Algerian landrace ALB01. Algerian landraces are  
178 also reported to have a strong need of vernalization [3]. Type 4 comprises landraces  
179 from Iberian and Apennine Peninsula together with the described thermoneutral  
180 cultivars (*i.e.* Neutra, [2]). Type 5 is composed only by Ethiopian landraces and Wild  
181 group is composed by the four “*graecus-type*” accessions of the panel, all presenting  
182 small black-speckled seeds and non-domesticated traits (hard seeds and shattering  
183 pods).

184 We examined genetic structure by performing a Bayesian model-based  
185 clustering analysis and found that the six population groups matched the maximum-  
186 likelihood tree (Fig. 2b). This presented evidence of significant admixture in some  
187 lines and a weak population structure, a pattern already seen in other studies of *L.*  
188 *albus* [21]. This weak population structure is also seen through the population-  
189 differentiation statistic ( $F_{ST}$ ). The  $F_{ST}$  value between all six groups were 0.27,  
190 however,  $F_{ST}$  between Type 1 and Type 2 are low as 0.086, and Type 4 and Wild  
191 have an  $F_{ST}$  of 0.092. Indeed, regarding the Bayesian model, in scenarios dividing  
192 the accessions in 4 or 5 sub-populations (Fig 2b,  $K=4$  and  $K=5$ ), accessions from  
193 Type 4 are merged with the Wild group. On the other hand, Type 5 showed a strong  
194 differentiation from the other groups, with  $F_{ST}$  values ranging from 0.34 to 0.46, with  
195 Type 4 and Type 3, respectively, which is corroborating with previous studies [22].  
196 Principal component analysis reinforced the similarity among some groups (Fig. 2c).  
197 The two first principal components explain 65.9% of genotypic variance and it is  
198 highlighting the overlap among certain groups, in particular, Type 1 and Type 2.



199           Differentiation of genetic diversity between the 6 groups was investigated  
200 further through analysis of decay of linkage disequilibrium (LD, Fig. 2d). The decay of  
201 LD with physical distance between SNPs to half of the maximum values occurred at  
202 3.85 Kb ( $r^2 = 0.38$ ), consistent with a high level of diversity and partially outcrossing  
203 mode of reproduction in this species [23]. Type 4 group also showed a fast LD decay  
204 of 5.7 Kb ( $r^2 = 0.40$ ) and Type 1-3 groups have an average LD decay of 10.5 Kb.  
205 Wild group showed a slower LD decay (38.1 Kb,  $r^2 = 0.39$ ) when comparing with the  
206 other white lupin groups, presumably an effect of the small number of wild  
207 accessions in the analysis. Nevertheless, these LD decay levels can still be  
208 considered fast compared with other plant species, for example rice (~75–150 Kb,  
209 [24]), soybean (~340-580 Kb, [25]) or wheat (~7-12.4 Mb, [26]), also self-pollinated  
210 crops. The Type 5 group (Ethiopian landraces) only reached half of its LD decay after  
211 1.5 Mb, reinforcing the high similarity of its accessions and a possible genetic  
212 isolation of this group [21]. The average nucleotide diversity  $\pi$  per site [27] showed  
213 that diversity was five times lower in Type 5 group ( $\pi = 0.068$ ) compared to the  
214 general nucleotide diversity ( $\pi = 0.372$ ). While the Wild group, although is also  
215 composed of only four accessions, showed a nucleotide diversity  $\pi = 0.402$ .

216

### 217 **Protein-coding genes presence and absence characterization**

218           Presence and absence variants (PAVs) are an important type of structural  
219 variation and play an important role in shaping genomes, therefore contributing to  
220 phenotypic diversity [28]. The construction of a white lupin pangenome allowed  
221 identification of 1195 PAVs, representing protein-coding genes that are absent in at  
222 least one of the accessions, being 1132 genes from the reference genome and 63  
223 from the newly identified genes (Supplementary Dataset 2-3). We further examined if

224 the phylogenetic groups have an influence in the number of PAVs and if the PAVs  
225 are homogeneous within the groups (Fig. 3a-c). The wild accessions have a  
226 significantly higher number of newly identified genes, with the accessions  
227 GRAECUS and GR38 only missing 4 of them. The four wild accessions share 157  
228 out of the 178 new-identified genes in the pangenome (Fig. 3a).

229 The number of missing genes within individual genomes ranges from 45  
230 (AMIGA – Type 1) to 348 genes (GRC5262B – Wild). Each group shares a median of  
231 31 common lost genes amongst all its accessions and a total of 103 genes are  
232 absent in at least one accession of each group (Fig. 3b). There are 137 genes that  
233 have been exclusively lost within accessions of the Wild group, however only 30  
234 genes are shared among all the *graecus* accessions. On the other hand, genomes of  
235 Ethiopian landraces (Type 5) share a total of 118 common missing genes, amongst  
236 39 are unique for this group. Remarkably, for this group there is a concentration of  
237 lost genes on Chr17. This includes a set of 9 tandem duplicated genes covering a  
238 region of 120 Kb (Supplementary Fig. 2). They are annotated as “Putative ferric-  
239 chelate reductase (NADH)” homologs of *Arabidopsis* gene *FRO2*, known for its role  
240 of iron uptake by the roots under stress condition [29].

241 Checking the position of the PAVs on the chromosomes we could identify  
242 some peculiarity regarding the PAVs within the groups. For example, on Chr13 there  
243 is a concentration of PAVs in the region of 5-10 Mb that are missing from most  
244 accessions of Type 2-5 and Wild, but are present in the genomes of most Type 1  
245 members. Similar pattern happens in the 3.6-6.4 Mb region of Chr04. Chr23 has the  
246 highest number of PAVs (78), a common feature of all the groups.

247 Functional analysis of PAVs suggests enrichment of GO terms as “integral  
248 component of membrane” (GO:0016021) and “oxidation-reduction process”

249 (GO:0055114) (Fig. 3d, supplementary Fig. 3 and Supplementary Data 2). These  
250 suggest an enrichment of genes and gene families coding for membrane receptors  
251 proteins or membrane transporters. Other GO terms suggest that some of the genes  
252 may be involved in cell wall remodeling (“cell wall” - GO:0005618; “cell wall  
253 organization” - GO:0071555). Genes with these functions are frequently linked to  
254 biotic and abiotic stress responses [30,31]. PAV genes related to abiotic and biotic  
255 stress responses have been observed in several plant species [15,17,18,32–35] and  
256 these may reflect the evolution for adaptive traits related for each agroecotype.  
257 Moreover, the presence/absence of these stress-response related genes may also  
258 be partially due to whole-genome triplication event on white lupin genome [8], which  
259 caused an overlapping roles in various loci.

260

### 261 **Footprints of selection and alleles identification in candidate genes**

262 To demonstrate the power of white lupin pangenome to address basic  
263 research questions, we used it to detect possible footprints of selection and to  
264 identify alleles in candidate genes underlying major QTLs. Firstly, to examine  
265 potential selective signals during white lupin domestication and breeding, we  
266 scanned white lupin genome searching for regions with marked reductions in  
267 nucleotide diversity (Fig. 4).

268 The domestication and breeding efforts in white lupin have focused in  
269 searching for accessions with reduced seed alkaloid content, reduced time to flower  
270 as well as excessive indeterminate branching. Therefore, we combined Type 1 and  
271 Type 2 accessions, that are spring types and went to a more intense breeding  
272 process and compared them with Type 3 and Type 4 accessions, that are winter  
273 types (Fig. 4a). A selective sweep affecting only the spring white lupin accessions

274 would be expected to leave a typical low-polymorphism and high-divergence signal  
275 around the region of the selected genes. We measured the sweep on the nucleotide  
276 diversity ( $\pi$  value [27]), by comparing the two groups ( $\pi_{\text{Winter}}/\pi_{\text{Spring}}$ ) over 250-kb  
277 windows. We identified 167 putative selection sweeps associated to the breeding of  
278 the spring accessions ( $\pi_{\text{Winter}}/\pi_{\text{Spring}} > 2.101$ ). We observed that some of the  
279 peaks co-localized with previously reported white lupin QTLs for flowering time and  
280 alkaloid content [36,37]. The same pattern was observed when checking for the  
281 divergence of the gene pool between these two groups along the chromosomes (Fst,  
282 Supplementary Fig. 4a).

283 Interestingly, other peaks with higher sweeps of diversity are present,  
284 indicating that other genomic regions may be implicated with these traits and may  
285 carry other important genes of these pathways. Furthermore, they highlight specific  
286 genomic regions of spring accessions that have been selected during domestication  
287 and breeding. For instance, we checked for orthologs of domestication genes from  
288 the close relative narrow-leaved lupin and found that the gene *Lalb\_Chr12g0203121*,  
289 a homolog of a candidate gene for the reduced pod shattering locus *tardus*  
290 (*Lup002448*, [38]), is co-localized with a sweep peak on Chr12.

291 The reported white lupin QTLs were identified in a recombinant inbred line  
292 (RIL) mapping population derived from the cross between Kiev Mutant (Type 1) and  
293 the Ethiopian landrace P27174 (Type 5). Thereupon, we checked the sweep of  
294 diversity between all accessions compared to Ethiopian accessions, T5  
295 ( $\pi_{\text{General}}/\pi_{\text{T5}}$ , Fig. 4b) and identified 84 sweep peaks ( $\pi_{\text{General}}/\pi_{\text{T5}} > 83.97$ ). A  
296 similar trend of co-localization of the QTL peaks were observed, with steep peaks  
297 around the QTL regions. Interestingly, the region corresponding the QTL *pauper* did  
298 not show a peak, being far below the statistical significance threshold. This indicates

299 that the two groups have similar level of nucleotide diversity in this region  
300 (Supplementary Fig. 4b). It can be explained by the above-mentioned similarities  
301 among accessions of group T5 and that many of the modern accessions carry the  
302 low alkaloid alleles for the pauper region. However, although this region showed a  
303 similar nucleotide diversity between the two groups, it presented a high genetic  
304 variance, with a median  $F_{ST}$  of 0.94 for the region (Fig. 4c).

305 In another approach to demonstrate the power of white lupin pangenome, we  
306 used its assembly to identify a candidate gene underlying a major QTL and describe  
307 the associated allelic diversity. Chromosome 2 is the location of an important QTL  
308 associated with early flowering white lupins. We used the protein sequences of  
309 *Lupinus angustifolius* that have been previously mapped in syntenic regions of the  
310 these QTLs [39] to perform an homology search against the pangenome. we  
311 identified the gene *LaFTa1* (Lalb\_Ch02g0156991), a homolog of the gene *LanFTa1*  
312 (Lup21189) mapped on this QTL region. The white lupin *LaFTa1*  
313 (Lalb\_Ch02g0156991) was annotated as “Putative phosphatidylethanolamine-  
314 binding protein” (PEBP) in the reference genome. The FT proteins belonging to the  
315 PEBP family are the key control points of the flowering time in plants. The *LaFTa1*  
316 gene presented a deletion of 686 on the third intron that is present only on Type 5  
317 accessions, that have late flowering phenotypes (Fig. 5a-b and Supplementary Fig.  
318 5). Indeed, one of the parents of this QTL mapping population belongs to this group  
319 (P27174). It is reported that changes in FT promoter and introns can alter FT  
320 expression in response to photoperiod and vernalization, and consequently, induce  
321 flowering [40]. This suggests that the identified *LaFTa1* is the gene underlying this  
322 QTL and that this deletion on the intron of Type 5 accessions may be contributing for  
323 the late flowering pattern of this group.

324

## 325 **DISCUSSION**

326 A pangenome is a complete set of genes for a species, including core genes  
327 which are present in all individuals, and variable genes which are absent in one or  
328 more individuals [41]. We generated a *de novo* assembly for 38 white lupin  
329 accessions and, taking advantage of a good reference assembly for the species [8],  
330 we constructed a *L. albus* pangenome by iteratively and randomly sampling these  
331 sequenced accessions. This dataset is representative of the diversity of the species,  
332 containing wild accessions, landraces and cultivars of white lupin from across their  
333 respective distributions. As a result, we estimate that this white lupin pangenome  
334 assembly effectively encompasses the complete sequence for the genome of the  
335 species, with 462,7Mb sequence and containing 38,446 protein-coding genes. The  
336 finding that 21.5% of genes in the pangenome exhibit varying degrees of genic  
337 presence/absence variants (PAVs) highlights the diverse genetic feature of white  
338 lupin and the significant improvement of the reference genome, by including genomic  
339 information of other accessions and discovery of new genes. Remarkably, the white  
340 lupin pangenome showed a high content of core genes (78.5%), as compared with  
341 other plant species as tomato (74.2%, [34]), *Arabidopsis thaliana* (70%, [19]), bread  
342 wheat (64%, [42]), sesame (58%, [16]) and wild soybean (49%, [43]), which might be  
343 a reflection of its domestication history and modest breeding efforts to date.

344 The domestication of white lupin started during Bronze Age [4], and the  
345 ancestral history of this species is different than other major crops such as rice,  
346 maize, sorghum, tomato, and soybeans, which are more ancient [44]. The early  
347 cultivated forms have the same Mediterranean distribution that its wild ancestor types  
348 (*graecus*), which led to small adaptation or selection differences. *L. albus*

349 domestication was slow with potentially centuries between acquisition of each  
350 domestication trait, which may explain why there is not a more pronounced genetic  
351 differentiation between wild, landrace and cultivated types [45]. This is echoed in the  
352 lack of population structure presented within these accessions and in the low LD  
353 extent, which generally reduce the diversity and change allele frequencies either to  
354 fixation or intermediate frequencies [46]. Despite being a largely self-pollinating crop  
355 (with an out-crossing rate reported as 8–10 %, [23]), white lupin showed a  
356 remarkably low LD extent (< 4kb), even lower than the wild population of its relative,  
357 narrow-leafed lupin, that showed a decay of LD after 19.01 Kb [47]. One distinction  
358 between these closely related species is that narrow-leafed lupin is almost  
359 exclusively self-pollinating and so the modest levels of outcrossing in white lupin may  
360 be a key factor governing the differences in LD between these two species. Having a  
361 low LD and weak population structure together mean that association mapping is  
362 likely to be particularly powerful in white lupin, in contrast to the more highly  
363 structured and high LD species narrow-leafed lupin, where association studies have  
364 so far proved rather weak [47,48].

365           Type 5 accessions, from Ethiopia, are the only group which shown a strong  
366 genetic differentiation from the others, with  $F_{ST}$  values higher than 0.3. Such a distinct  
367 separation is an evidence that the Ethiopian accessions have evolved in isolation and  
368 the genetic differences are probably due to ancient founder effects. The differences  
369 of Type 5 group are also highlighted by the PAVs. Together with the Wild group,  
370 Ethiopian landraces carry most of the new identified genes and also miss a large  
371 number of genes of the reference genome (Fig. 3). Moreover, it is a highly  
372 homogeneous group, with all accessions sharing a large number of these lost genes.  
373 The loss of these genes is probably an adaptive response for the local environment.

374 For instance, the loss of the nine tandem duplicated homologue *AtFRO2* on Chr17  
375 might be an adaptive response to highland Ethiopian soils that are iron-rich [49]. A  
376 more detailed look into the PAVs among the different groups may be useful to better  
377 understand their specificities.

378 Our analysis brings a high resolution to the within-species diversity. Using the  
379 pangenome dataset, we performed genome-wide comparisons of the assemblies,  
380 enabling the characterization of more than 3 million complex variants, including many  
381 large-effect coding variants which should be helpful in pinpointing causal variations in  
382 QTLs for important traits and in future genome-wide association studies. In particular,  
383 our study demonstrated that 4,725 genes were found to contain important coding  
384 variation in at least one accession and might have important biological functions  
385 underlying the variation of complex traits.

386 We wanted to demonstrate how a pangenome can be a useful tool to identify  
387 allelic differences that are responsible for phenotypic variation. By performing a  
388 genome wide analysis, we detected that nucleotide diversity were quite variable  
389 across the genome. The efforts of breeding in white lupin have been focused in  
390 combining of domestication traits such as soft and white seeds and reduced pod-  
391 shattering, which were already available from ancient times, with that of reduced  
392 alkaloids, increased yield and the reduction of flowering time and excessive  
393 branching [45]. Looking for differences in nucleotide diversity across the genome  
394 amongst breeding accessions and comparing with landraces/wild accessions, we  
395 could detect some peaks of sweep of diversity. In these peaks there is an important  
396 decrease of nucleotide diversity within the breeding lines and they represent marks of  
397 selection (Fig. 4). In these regions were also detect a high divergence between the  
398 two gene pools (*Fst*). However, although the sweeps of diversity co-localize with



399 some identified QTLs for flowering time and low alkaloid content, there are other  
400 higher peaks along the chromosomes. These regions should be explored in order to  
401 find genes underlying phenotypic traits that have been selected directly or indirectly  
402 during domestication and breeding of white lupin. For instance, white lupin is known  
403 for thriving in soils with low nutrient availability by producing specialized root  
404 structures called cluster roots [50]. In a previous work, we demonstrated that the  
405 breeding accessions have an earlier establishment of the root system through lateral  
406 and cluster root formation that was indirectly selected [8]. By looking closer in these  
407 chromosome regions with low nucleotide diversity and high genetic differentiation we  
408 might be able to find genes with important roles in the root architecture of white lupin.  
409 Hence, integration of the information from studies of gene function and the high  
410 density of variants described in this pangenome can provide a complementary  
411 approach to forward genetic studies and can contribute to develop the research and  
412 breeding of white lupin.

413

## 414 **CONCLUSION**

415 In summary, the white lupin pangenome comprises a wealth of information on  
416 genetic variation that has yet to be fully exploited by researchers and breeders.  
417 Although there is a large collection of white lupin accessions available in genebanks  
418 worldwide, they barely have been explored and genetically characterized. This  
419 pangenome represents a comprehensive and important resource to facilitate the  
420 exploration of white lupin as a legume model for future functional studies and  
421 molecular breeding.

422

423

## 424 **METHODS**

### 425 **Genome sequences of white lupin accessions**

426 We retrieved the genome sequencing data of 15 white lupin accessions that  
427 were published previously [8], including 11 modern cultivars, 1 landrace and 2 wild  
428 relatives. They were sequenced using Illumina technology using paired-end 2 × 150  
429 bp short-reads with average sequencing depth of 45.99x. It included Illumina genome  
430 data of 64.47x depth for the reference cultivar “AMIGA”. Genome sequences of  
431 additional 24 accessions were generated here, including 12 modern cultivars, 9  
432 landraces and 2 wild relatives. Young leaves of individual plants were used to extract  
433 genomic DNA of each accession using the QIAGEN DNeasy Plant Mini kit following  
434 the supplier’s recommendations. The accessions were sequenced using Illumina  
435 technology using paired-end 2 × 150 bp short-reads (Macrogen, South Korea). It was  
436 generated a total of 196.85 Gb of data with average sequencing depth of 19.1x.  
437 (Supplementary Table 2).

438

### 439 **De novo genome assembly and pangenome construction**

440 Reads were processed to trim adapters and low-quality sequences using  
441 Cutadapt 1.15 [51] with parameters ‘--pair-filter=any -q20,20 -m 35’ and the forward  
442 and reverse Illumina TruSeq Adapters. The final high-quality cleaned Illumina reads  
443 from each sample were *de novo* assembled using Spades 3.13.0 [52] with k-mer size  
444 of 21,33,55,77,99,121. The assembled contigs were then aligned to the white lupin  
445 reference genome [8] (GenBank accession no.: WOCE00000000,  
446 <http://www.whitelupin.fr>), using the steps 7 and 8 of the EUPAN Pipeline [53], in  
447 order to extract contigs that were not aligning to the reference. Then, redundancy in  
448 the extracted contigs has been reduced using CD-hit 4.8.1 with default parameters.

449 The resulting contigs were then search against the NCBI nt nucleotide database  
450 using blastn 2.10 [54]. Sequences with best hits from outside the Eudicots, or  
451 covered by known plant mitochondrial or chloroplast genomes, were possible  
452 contaminations and were therefore removed.

453

#### 454 **Annotation of the white lupin pangenome**

455 A custom repeat library was constructed by screening the pangenome and the  
456 white lupin reference genome using RepeatModeler  
457 (<http://www.repeatmasker.org/RepeatModeler/>), and used to screen the nonreference  
458 genome to identify repeat sequences using RepeatMasker  
459 (<http://www.repeatmasker.org/>). Contigs with more than 98% of repetitive sequences  
460 were removed from the annotation pipeline. Protein-coding genes were predicted  
461 from nonreference genome using MAKER2 [55]. *Ab initio* gene prediction was  
462 performed using Augustus [56] and SNAP [57]. Augustus [58] has been previously  
463 trained for white lupin as described in the documentation, and SNAP was trained for  
464 two rounds based on already assembled transcriptome of white lupin, as described in  
465 maker2 documentation. In addition, protein sequences of white lupin, *Medicago*  
466 *truncatula* and the Viridiplantae subset of Swissprot were used as evidence. Finally,  
467 gene predictions based on *ab initio* approaches, and transcript and protein evidence  
468 were integrated using the MAKER2 pipeline. A set of high-confidence gene models  
469 supported by transcript and/or protein evidence were generated by MAKER2. In  
470 order to remove possible remaining contamination, all high confidence maker  
471 generated protein sequences were aligned against the nr databses, and sequences  
472 with best hits from outside Eudicots or with best hit inside chloroplastic and

473 mitochondrial sequences were removed. Genes that matched white lupin reference  
474 sequences were also removed the same way.

475 In parallel, contigs with a length superior to 2Kb from the whole assembly of  
476 the 39 lupin accession were annotated using the Egnep 1.5.1 pipeline [59].  
477 RepeatMasker was used to detect and remove contigs constitute by more than 98%  
478 of known repeat sequences based on the previously built white lupin repetitive  
479 element sequences database. The white lupin transcriptome [8] was used as ESTs  
480 evidence, using a minimum identity percentage of 95%, along with the proteome of  
481 white lupin, *Medicago truncatula*, and the Viridiplantae subset of the swissprot  
482 database, with weight of 0.4, 0.3 and 0.3 respectively. Resulting predicted proteins  
483 were search against REXdb and rebase in order to remove possible transposable  
484 elements. The resulting genes prediction were again scan with repeat-masker, and  
485 genes composed of more than 90% of detected repetitive sequences were removed  
486 from further analyses in order to control false positive.

487

#### 488 **Gene presence/absence variation and pangenome modeling**

489 Reads were processed to trim adapters and low-quality sequences using  
490 Cutadapt 1.15 [51] with parameters '--pair-filter=any -q20,20 -m 35' and the forward  
491 and reverse Illumina TruSeq adapters. Resulting high quality reads were then aligned  
492 to the pangenome using BWA-MEM [60] with default parameters. Picard tools was  
493 used to remove possible PCR and optical duplicates, and reads considered as not  
494 properly paired were removed using samtools view. The presence or absence of  
495 each gene in each accession was determined using SGSGeneLoss [14]. In brief, for  
496 a given gene in a given accession, if less than 10% of its exon regions were covered  
497 by at least five reads (minCov = 5, lostCutoff = 0.1), this gene was treated as absent

498 in that accession, otherwise it was considered present. The parameters used for the  
499 new set of gene discovered in the pangenome were different: minCov = 10 and  
500 lostCutoff = 0.8. For more precise pangenome studies taking into account all the  
501 genes discovered in all the different varieties, GET\_HOMOLOGUES\_EST was used  
502 on the whole CDS and proteome of the whole 39 varieties with parameters “-R  
503 123545 -P -M -c -z -A -t 2” to detect clusters of genes shared by at least two  
504 varieties.

505

### 506 **SNP discovery and annotation**

507 Cutadapt [61] was used to remove Illumina Truseq adapters from the  
508 sequencing data and to remove bases with a quality score lower than 30, in both 5'  
509 and 3' end of the reads. Reads with a length lower than 35 were discarded. We then  
510 used BWA-MEM version 0.7.17 [60] to map the resequencing reads from all 39  
511 genotypes to the white lupin reference genome. PCR and Optical duplicates were  
512 detected and removed using Picard Tools. After that, GATK 4 HaplotypeCaller tool  
513 was used in emit-ref-confidence GVCF mode to produce one gvcf file per sample.  
514 These files were merged using GATK Combine GVCFs. Finally, GATK  
515 GenotypeGVCFs was used to produce a vcf file containing variants from all the 39  
516 samples. This identified a total of 9,442,876 SNPs/indel. After filtering for minimum  
517 allele frequency of 0.15 and heterozygosity frequency of 0–0.2, 3,527,872 SNPs  
518 were retained for further analysis.

519

### 520 **Evolutionary analysis**

521 A maximum-likelihood phylogenetic tree was constructed based on 3,121,673  
522 parsimony-informative SNPs with 1,000 bootstraps using IQ-TREE [62] using

523 ModelFinder [63] option. Then, a phylogenetic tree was prepared using the iTOL v  
524 4.3 [64].

525 Population structure based on the same set of SNPs was investigated using  
526 STRUCTURE [65]. Thirty independent runs for each K from 1 to 15 were performed  
527 with an admixture model at 50,000 Markov chain Monte Carlo (MCMC) iterations and  
528 a 10,000 burn-in period. Principal component analysis using this SNP dataset was  
529 performed using the function “princomp” in R (<http://www.R-project.org/>). The linkage  
530 disequilibrium (LD) pattern was computed using PopLDdecay v3.40 [66]. LD decay  
531 was measured on the basis of the  $r^2$  value and the corresponding distance between  
532 two given SNPs.

533

#### 534 **Selective sweep analyses**

535 To detect genomic regions affected by domestication we used the same set of  
536 3,121,673 SNPs using Tassel [67]. The level of genetic diversity ( $\pi$ ) was measured  
537 with a window size of 2000 SNPs and a step size of the same length, generating  
538 windows of approximately 250-kb. Genome regions affected by selection or  
539 domestication should have substantially lower diversity in spring white lupin (Types 1  
540 and 2,  $\pi_{\text{Spring}}$ ) than the diversity in winter accession (Type 3 and 4,  $\pi_{\text{Winter}}$ ) and  
541 Ethiopian accessions ( $\pi_{\text{T5}}$ ). Windows with the top 10% highest ratios of  
542  $\pi_{\text{Winter}}/\pi_{\text{Spring}}$  ( $\geq 2.101$ ) or  $\pi_{\text{General}}/\pi_{\text{CA}}$  ( $\geq 83.969$ ) were selected as candidate  
543 selection and domestication sweeps. The PopGenome package [68] in R with its  
544 sliding window method was used to calculate the interpopulation differentiation,  $F_{\text{ST}}$ .  
545 Using a set of 40 k random good-quality SNPs evenly distributed along the 25  
546 chromosomes, we calculated nonoverlapping sliding-windows of 10 SNPs each.

547

548 **REFERENCES**

- 549 1. Taylor JL, De Angelis G, Nelson MN. How Have Narrow-Leafed Lupin Genomic  
550 Resources Enhanced Our Understanding of Lupin Domestication? Springer, Cham;  
551 2020. p. 95–108.
- 552 2. Wolko B, Clements JC, Naganowska B, Nelson M, Hua'an Y. *Lupinus*. Kole C,  
553 editor. *Wild Crop Relat. Genomic Breed. Resour. Legum. Crop. Forages*. Berlin,  
554 Heidelberg: Springer Berlin Heidelberg; 2011.
- 555 3. Kurlovich BS. *Lupins: Geography, Classification, Genetic Resources and*  
556 *Breeding*. Publishing House "Intan"; 2002.
- 557 4. Gladstones JS. Distribution, origin, taxonomy, history and importance. *Lupins as*  
558 *Crop Plants Biol Prod Utilization* Gladstones JS, Atkins C, Hamblin J(eds) CAB Int  
559 Oxon, New York. 1998. p. 1–39.
- 560 5. Kinghorn AD, Hussain RA, Robbins EF, Balandrin MF, Stirton CH, Evans S V.  
561 Alkaloid distribution in seeds of *Ormosia*, *Pericopsis* and *Haplormosia*.  
562 *Phytochemistry*. 1988;27:439–44.
- 563 6. van Wyk B-E. The value of chemosystematics in clarifying relationships in the  
564 genistoid tribes of papilionoid legumes. *Biochem Syst Ecol*. 2003;31:875–84.
- 565 7. Wink M, Mohamed GIA. Evolution of chemical defense traits in the Leguminosae:  
566 mapping of distribution patterns of secondary metabolites on a molecular phylogeny  
567 inferred from nucleotide sequences of the *rbcl* gene. *Biochem Syst Ecol*.  
568 2003;31:897–917.
- 569 8. Hufnagel B, Marques A, Soriano A, Marquès L, Divol F, Dumas P, et al. High-  
570 quality genome sequence of white lupin provides insight into soil exploration and  
571 seed quality. *Nat Commun*. Springer US; 2020;11:492.
- 572 9. Xu W, Zhang Q, Yuan W, Xu F, Muhammad Aslam M, Miao R, et al. The genome

- 573 evolution and low-phosphorus adaptation in white lupin. *Nat Commun.* Springer US;  
574 2020;11:1069.
- 575 10. Golicz AA, Bayer PE, Barker GC, Edger PP, Kim H, Martinez PA, et al. The  
576 pangenome of an agronomically important crop plant *Brassica oleracea*. *Nat*  
577 *Commun.* Nature Publishing Group; 2016;7:13390.
- 578 11. Vernikos G, Medini D, Riley DR, Tettelin H. Ten years of pan-genome analyses.  
579 *Curr Opin Microbiol.* 2015;23:148–54.
- 580 12. Gao L, Gonda I, Sun H, Ma Q, Bao K, Tieman DM, et al. The tomato pan-  
581 genome uncovers new genes and a rare allele regulating fruit flavor. *Nat Genet.*  
582 Springer US; 2019;51:1044–51.
- 583 13. Naganowska B, Wolko B, Śliwińska E, Kaczmarek Z. Nuclear DNA content  
584 variation and species relationships in the genus *Lupinus* (Fabaceae). *Ann Bot.*  
585 2003;92:349–55.
- 586 14. Golicz AA, Martinez PA, Zander M, Patel DA, Van De Wouw AP, Visendi P, et al.  
587 Gene loss in the fungal canola pathogen *Leptosphaeria maculans*. *Funct Integr*  
588 *Genomics.* 2015;15:189–96.
- 589 15. Gordon SP, Contreras-Moreira B, Woods DP, Des Marais DL, Burgess D, Shu S,  
590 et al. Extensive gene content variation in the *Brachypodium distachyon* pan-genome  
591 correlates with population structure. *Nat Commun.* Springer US; 2017;8:2184.
- 592 16. Yu J, Golicz AA, Lu K, Dossa K, Zhang Y, Chen J, et al. Insight into the evolution  
593 and functional characteristics of the pan-genome assembly from sesame landraces  
594 and modern cultivars. *Plant Biotechnol J.* 2019;17:881–92.
- 595 17. Zhao J, Bayer PE, Ruperao P, Saxena RK, Khan AW, Golicz AA, et al. Trait  
596 associations in the pangenome of pigeon pea (*Cajanus cajan*). *Plant Biotechnol J.*  
597 2020;pbi.13354.



- 598 18. Montenegro JD, Golicz AA, Bayer PE, Hurgobin B, Lee H, Chan C-KK, et al. The  
599 pangenome of hexaploid bread wheat. *Plant J.* 2017;90:1007–13.
- 600 19. Contreras-Moreira B, Cantalapiedra CP, García-Pereira MJ, Gordon SP, Vogel  
601 JP, Igartua E, et al. Analysis of Plant Pan-Genomes and Transcriptomes with  
602 GET\_HOMOLOGUES-EST, a Clustering Solution for Sequences of the Same  
603 Species. *Front Plant Sci.* 2017;8:1–16.
- 604 20. Adhikari K, Buirchell B, Yan G, Sweetingham M. Two complementary dominant  
605 genes control flowering time in albus lupin (*Lupinus albus* L.). *Plant Breed.*  
606 2011;130:496–9.
- 607 21. Raman R, Cowley RB, Raman H, Lockett DJ. Analyses Using SSR and DArT  
608 Molecular Markers Reveal that Ethiopian Accessions of White Lupin  
609 (&lt;i>Lupinus albus</i> L.) Represent a Unique  
610 Genepool. *Open J Genet.* 2014;04:87–98.
- 611 22. Raman R, Cowley RB, Raman H, Lockett DJ. Analyses Using SSR and DArT  
612 molecular markers reveal that Ethiopian accessions of white lupin (*Lupinus albus* L.)  
613 represent a unique genepool. *Open J Genet.* 2014;4:87–98.
- 614 23. Green A, Brown A, Oram R. Determination of outcrossing rate in a breeding  
615 population of *Lupinus albus* L. (White Lupin). *Plant Breed.* 1980;84:181–91.
- 616 24. Mather K a, Caicedo AL, Polato NR, Olsen KM, McCouch S, Purugganan MD.  
617 The extent of linkage disequilibrium in rice (*Oryza sativa* L.). *Genetics.*  
618 2007;177:2223–32.
- 619 25. Hyten DL, Choi I-Y, Song Q, Shoemaker RC, Nelson RL, Costa JM, et al. Highly  
620 Variable Patterns of Linkage Disequilibrium in Multiple Soybean Populations.  
621 *Genetics.* 2007;175:1937–44.
- 622 26. Molero G, Joynson R, Pinera-Chavez FJ, Gardiner L, Rivera-Amado C, Hall A, et

- 623 al. Elucidating the genetic basis of biomass accumulation and radiation use efficiency  
624 in spring wheat and its role in yield potential. *Plant Biotechnol J.* 2019;17:1276–88.
- 625 27. Tajima F. Evolutionary relationship of DNA sequences in finite populations.  
626 *Genetics.* 1983;105:437–60.
- 627 28. Marroni F, Pinosio S, Morgante M. Structural variation and genome complexity: is  
628 dispensable really dispensable? *Curr Opin Plant Biol.* Elsevier Current Trends;  
629 2014;18:31–6.
- 630 29. Connolly EL, Campbell NH, Grotz N, Prichard CL, Guerinot M Lou.  
631 Overexpression of the FRO2 Ferric Chelate Reductase Confers Tolerance to Growth  
632 on Low Iron and Uncovers Posttranscriptional Control. *Plant Physiol.*  
633 2003;133:1102–10.
- 634 30. Osakabe Y, Yamaguchi-Shinozaki K, Shinozaki K, Tran LSP. Sensing the  
635 environment: Key roles of membrane-localized kinases in plant perception and  
636 response to abiotic stress. *J Exp Bot.* 2013;64:445–58.
- 637 31. Novaković L, Guo T, Bacic A, Sampathkumar A, Johnson KL. Hitting the Wall-  
638 Sensing and Signaling Pathways Involved in Plant Cell Wall Remodeling in  
639 Response to Abiotic Stress. *Plants (Basel, Switzerland).* MDPI; 2018;7:89.
- 640 32. Bayer PE, Golicz AA, Tirnaz S, Chan CKK, Edwards D, Batley J. Variation in  
641 abundance of predicted resistance genes in the Brassica oleracea pangenome. *Plant*  
642 *Biotechnol J.* 2019;17:789–800.
- 643 33. Zhou P, Silverstein KAT, Ramaraj T, Guhlin J, Denny R, Liu J, et al. Exploring  
644 structural variation and gene family architecture with De Novo assemblies of 15  
645 Medicago genomes. *BMC Genomics.* BMC Genomics; 2017;18:1–14.
- 646 34. Gao L, Gonda I, Sun H, Ma Q, Bao K, Tieman DM, et al. The tomato pan-  
647 genome uncovers new genes and a rare allele regulating fruit flavor.

- 648 35. Shen X, Liu ZQ, Mocoour A, Xia Y, Jing HC. PAV markers in Sorghum bicolor:  
649 genome pattern, affected genes and pathways, and genetic linkage map  
650 construction. *Theor Appl Genet.* 2015;128:623–37.
- 651 36. Phan HTT, Ellwood SR, Adhikari K, Nelson MN, Oliver RP. The first genetic and  
652 comparative map of white lupin (*Lupinus albus* L.): Identification of QTLs for  
653 anthracnose resistance and flowering time, and a locus for alkaloid content. *DNA*  
654 *Res.* 2007;14:59–70.
- 655 37. Książkiewicz M, Nazzicari N, Yang H, Nelson MN, Renshaw D, Rychel S, et al. A  
656 high-density consensus linkage map of white lupin highlights synteny with narrow-  
657 leafed lupin and provides markers tagging key agronomic traits. *Sci Rep.*  
658 2017;7:15335.
- 659 38. Plewiński P, Książkiewicz M, Rychel-Bielska S, Rudy E, Wolko B. Candidate  
660 domestication-related genes revealed by expression quantitative trait loci mapping of  
661 narrow-leafed lupin (*Lupinus angustifolius* L.). *Int J Mol Sci.* 2019;20:1–24.
- 662 39. Rychel S, Książkiewicz M, Tomaszewska M, Bielski W, Wolko B. FLOWERING  
663 LOCUS T, GIGANTEA, SEPALLATA, and FRIGIDA homologs are candidate genes  
664 involved in white lupin (*Lupinus albus* L.) early flowering. *Mol Breed.* 2019;39:43.
- 665 40. Andrés F, Coupland G. The genetic basis of flowering responses to seasonal  
666 cues. *Nat. Rev. Genet.* 2012.
- 667 41. Golicz AA, Batley J, Edwards D. Towards plant pangenomics. *Plant Biotechnol J.*  
668 2016;14:1099–105.
- 669 42. Montenegro JD, Golicz AA, Bayer PE, Hurgobin B, Lee HT, Chan CKK, et al. The  
670 pangenome of hexaploid bread wheat. *Plant J.* 2017;90:1007–13.
- 671 43. Li YH, Zhou G, Ma J, Jiang W, Jin LG, Zhang Z, et al. De novo assembly of  
672 soybean wild relatives for pan-genome analysis of diversity and agronomic traits. *Nat*

- 673 Biotechnol. 2014;32:1045–52.
- 674 44. Diamond J. Evolution, consequences and future of plant and animal  
675 domestication. Nature. Nature Publishing Group; 2002. p. 700–7.
- 676 45. Wolko B, Clements JC, Naganowska B, Nelson MN, Yang H. Lupinus. Wild Crop  
677 Relat Genomic Breed Resour. Berlin, Heidelberg: Springer Berlin Heidelberg; 2011.  
678 p. 153–206.
- 679 46. Hamblin MT, Jannink J-L. Factors Affecting the Power of Haplotype Markers in  
680 Association Studies. Plant Genome J. 2011;4:145.
- 681 47. Mousavi-Derazmahalleh M, Nevado B, Bayer PE, Filatov DA, Hane JK, Edwards  
682 D, et al. The western Mediterranean region provided the founder population of  
683 domesticated narrow-leafed lupin. Theor Appl Genet. Springer Berlin Heidelberg;  
684 2018;131:2543–54.
- 685 48. Mousavi-Derazmahalleh M, Bayer PE, Nevado B, Hurgobin B, Filatov D, Kilian A,  
686 et al. Exploring the genetic and adaptive diversity of a pan-Mediterranean crop wild  
687 relative: narrow-leafed lupin. Theor Appl Genet. Springer Berlin Heidelberg;  
688 2018;131:887–901.
- 689 49. Elias E. Soils of the Ethiopian Highlands: Geomorphology and Properties. 2016.
- 690 50. Lambers H, Bishop JG, Hopper SD, Laliberté E, Zúñiga-Feest A. Phosphorus-  
691 mobilization ecosystem engineering: the roles of cluster roots and carboxylate  
692 exudation in young P-limited ecosystems. Ann Bot. 2012;110:329–48.
- 693 51. Bolger AM, Lohse M, Usadel B. Trimmomatic: a flexible trimmer for Illumina  
694 sequence data. Bioinformatics. 2014/04/01. Oxford University Press; 2014;30:2114–  
695 20.
- 696 52. Bankevich A, Nurk S, Antipov D, Gurevich AA, Dvorkin M, Kulikov AS, et al.  
697 SPAdes: A New Genome Assembly Algorithm and Its Applications to Single-Cell

- 698 Sequencing. *J Comput Biol.* 2012;19:455–77.
- 699 53. Hu Z, Sun C, Lu KC, Chu X, Zhao Y, Lu J, et al. EUPAN enables pan-genome  
700 studies of a large number of eukaryotic genomes. *Bioinformatics.* 2017;33:2408–9.
- 701 54. Camacho C, Coulouris G, Avagyan V, Ma N, Papadopoulos J, Bealer K, et al.  
702 BLAST+: architecture and applications. *BMC Bioinformatics. BioMed Central;*  
703 2009;10:421.
- 704 55. Yandell M, Holt C. MAKER2: an annotation pipeline and genome-database  
705 management tool for second-generation genome projects. *BMC Bioinformatics.*  
706 2011;12:491.
- 707 56. Stanke M, Morgenstern B. AUGUSTUS: a web server for gene prediction in  
708 eukaryotes that allows user-defined constraints. *Nucleic Acids Res.* 2005;33:W465–  
709 7.
- 710 57. Korf I. Gene finding in novel genomes. *BMC Bioinformatics.* 2004;5.
- 711 58. Stanke M, Diekhans M, Baertsch R, Haussler D. Using native and syntenically  
712 mapped cDNA alignments to improve de novo gene finding. *Bioinformatics.*  
713 2008;24:637–44.
- 714 59. Sallet E, Gouzy J, Schiex T. EuGene-PP: A next-generation automated  
715 annotation pipeline for prokaryotic genomes. *Bioinformatics.* 2014;30:2659–61.
- 716 60. Li H, Durbin R. Fast and accurate long-read alignment with Burrows-Wheeler  
717 transform. *Bioinformatics.* 2010;26:589–95.
- 718 61. Martin M. Cutadapt removes adapter sequences from high-throughput  
719 sequencing reads. *EMBnet.journal.* 2011;17:10.
- 720 62. Nguyen L-T, Schmidt HA, von Haeseler A, Minh BQ. IQ-TREE: A Fast and  
721 Effective Stochastic Algorithm for Estimating Maximum-Likelihood Phylogenies. *Mol*  
722 *Biol Evol.* 2015;32:268–74.

- 723 63. Kalyaanamoorthy S, Minh BQ, Wong TKF, von Haeseler A, Jermini LS.  
724 ModelFinder: fast model selection for accurate phylogenetic estimates. *Nat Methods*.  
725 Nature Publishing Group, a division of Macmillan Publishers Limited. All Rights  
726 Reserved.; 2017;14:587–9.
- 727 64. Letunic I, Bork P. Interactive tree of life (iTOL) v3: an online tool for the display  
728 and annotation of phylogenetic and other trees. *Nucleic Acids Res*. 2016;44:W242–5.
- 729 65. Hubisz MJ, Falush D, Stephens M, Pritchard JK. Inferring weak population  
730 structure with the assistance of sample group information. *Mol Ecol Resour*.  
731 2009;9:1322–32.
- 732 66. Zhang C, Dong SS, Xu JY, He WM, Yang TL. PopLDdecay: A fast and effective  
733 tool for linkage disequilibrium decay analysis based on variant call format files.  
734 *Bioinformatics*. 2019;35:1786–8.
- 735 67. Bradbury PJ, Zhang Z, Kroon DE, Casstevens TM, Ramdoss Y, Buckler ES.  
736 TASSEL: software for association mapping of complex traits in diverse samples.  
737 *Bioinformatics*. 2007;23:2633–5.
- 738 68. Pfeifer B, Wittelsbürger U, Ramos-Onsins SE, Lercher MJ. PopGenome: An  
739 Efficient Swiss Army Knife for Population Genomic Analyses in R. *Mol Biol Evol*.  
740 2014;31:1929–36.

#### 741 **ACKNOWLEDGEMENTS**

742

#### 743 **DECLARATIONS**

#### 744 **Ethics approval and consent to participate**

745 Not applicable

746

#### 747 **Consent for publication**

748 Not applicable

749

750 **Competing interests**

751 The authors declare that they have no competing interests.

752

753 **Funding**

754 This project has received funding from the European Research Council (ERC) under  
755 the European Union's Horizon 2020 research and innovation program (Starting Grant  
756 LUPINROOTS - grant agreement No 637420 to B.P.) and from the Innovate UK  
757 project 133048 (Ethiopian Lupins for Food and Feed) to H.S.

758

759 **Availability of data and materials**

760 The detailed methods and datasets supporting the conclusions of this report are  
761 included within the article and its additional files. All deep sequencing data reported  
762 in this paper have been submitted to the NCBI. The datasets generated and  
763 analyzed during the current study are available from the corresponding author upon  
764 request. Full genomic and raw sequence data are publicly available for download on  
765 the White Lupin genome portal [[www.whitelupin.fr/pangenome](http://www.whitelupin.fr/pangenome)] that contains a  
766 Genome Browser, Expression tools and a Sequence retriever dedicated to the  
767 pangenome. The pangenome project and raw data has been deposited at  
768 DDBJ/ENA/GenBank under the accession PRJNA608889.

769

770 **Authors' contributions**

771 A.S. developed bioinformatic resources and performed pangenome assembly. J.T.  
772 and F.D. performed DNA extraction and experiments. M.N., H.S., L.Y. and M.K.

773 provided genetic material. B.H. performed data analysis. B.H., M.K., M.N. and B.P.

774 designed experiments and wrote the article.

775

776 **Corresponding authors**

777 Correspondence to Benjamin Péret ([benjamin.peret@supagro.fr](mailto:benjamin.peret@supagro.fr)) and Bárbara

778 Hufnagel ([barbara.hufnagel@supagro.fr](mailto:barbara.hufnagel@supagro.fr)).



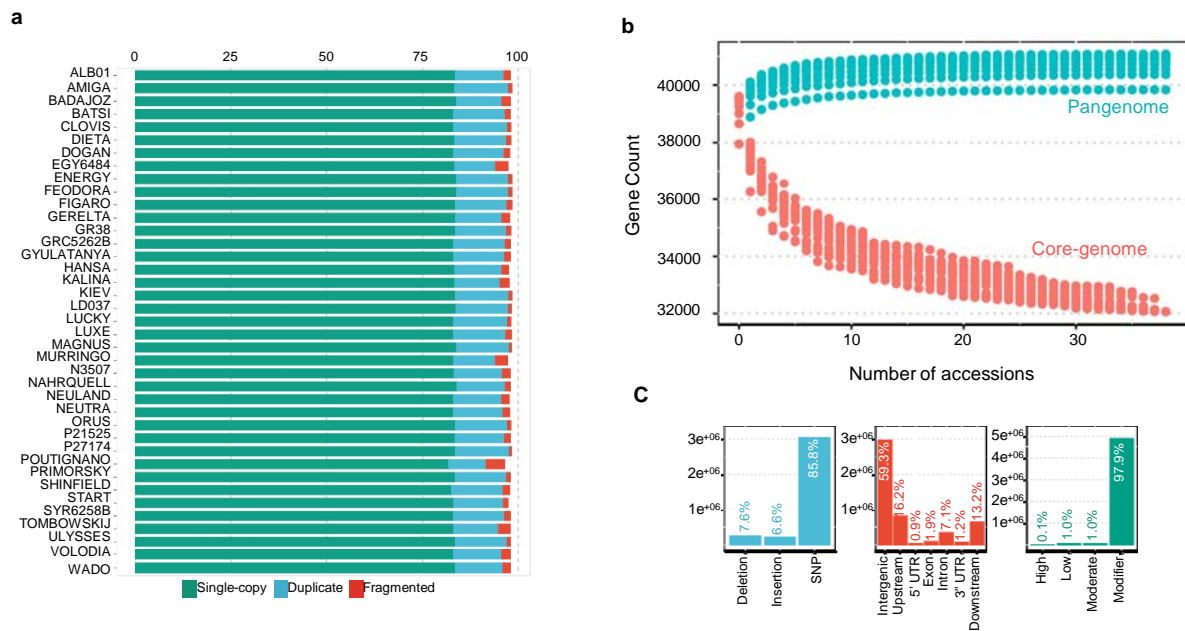

**Figure 1. Pangenome of *L. albus*.** (a) BUSCO percent completeness of all assemblies. All of the assemblies of this study have BUSCO completeness higher than 91.7%. (b) Pangenome modeling (c) Distribution of variants along white lupin pangenome. Types of variations identified (blue); positioning of the variants in the genome in relation to the gene structures (red); impact of the variants (green).

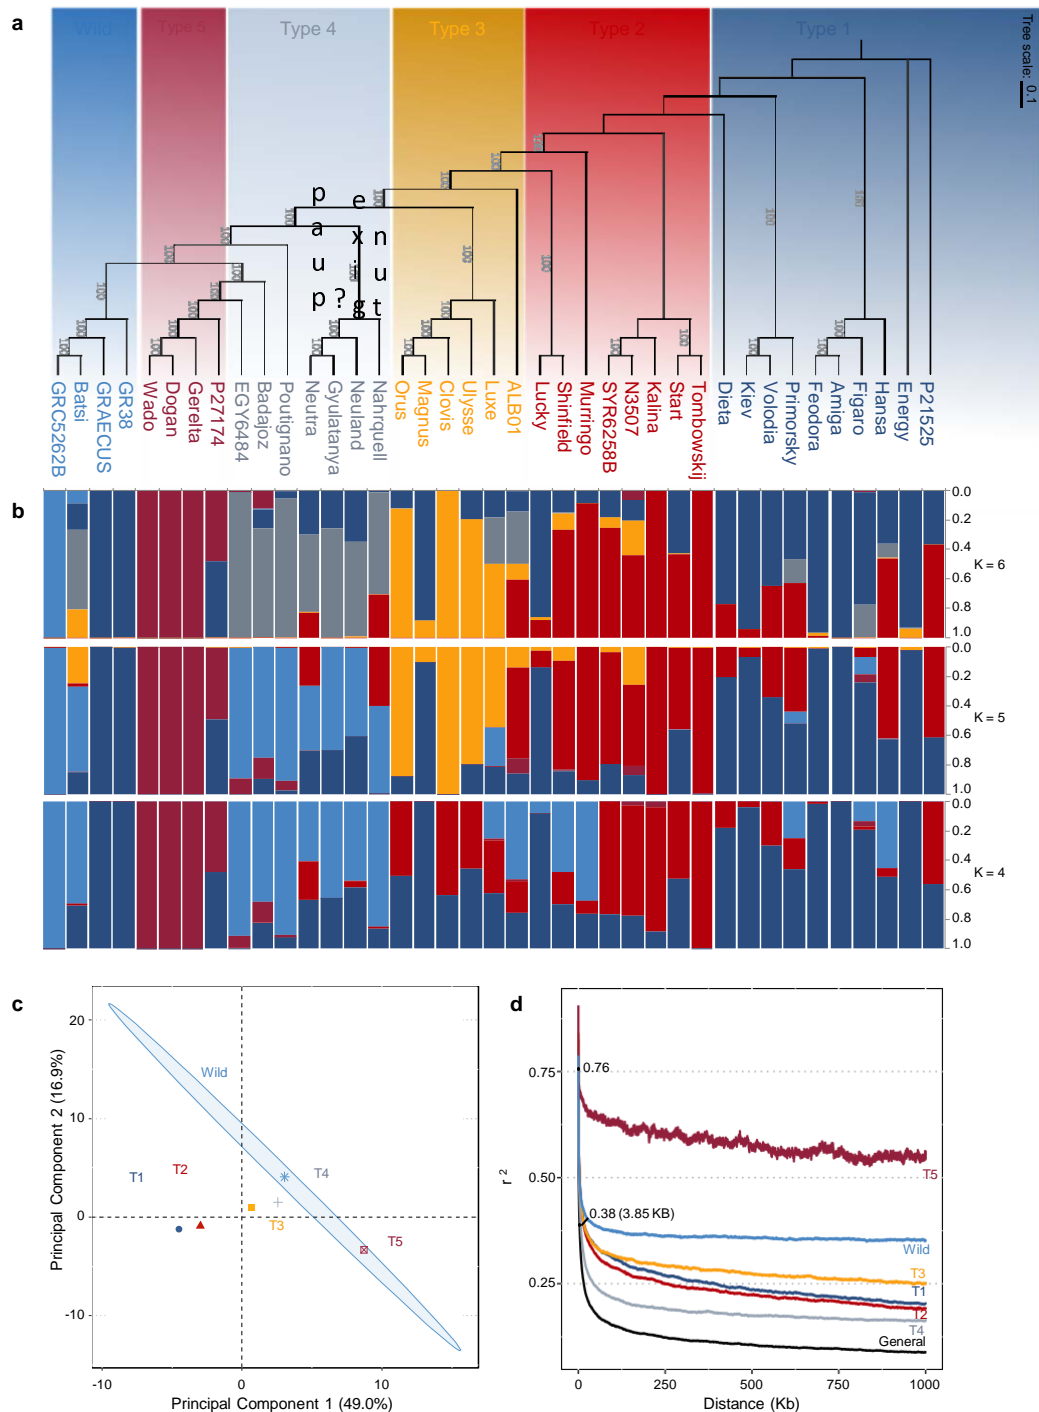

**Figure 2. Phylogeny and population structure of 39 accessions of *L. albus*.** (a) Maximum likelihood phylogenetic tree of white lupin constructed based on 3.5 M SNPs. The accessions are divided in 6 idiotypes. (b) Model-based clustering analysis with different numbers of ancestral kinships ( $k=4, 5$  and  $6$ ). The y axis quantifies cluster membership and the x axis list the different accessions. The positions of these accessions on the x axis are consistent with those in the phylogenetic tree. (c) Principal component analysis based on 3.5 M SNPs. The ellipses are discriminating the accessions of each idiotypic groups. (d) Genome-wide average LD decay estimated from different white lupin group. The decay of LD with physical distance between SNPs to half of the maximum values occurred at 3.85 kb ( $r^2 = 0.38$ ) considering all accessions.

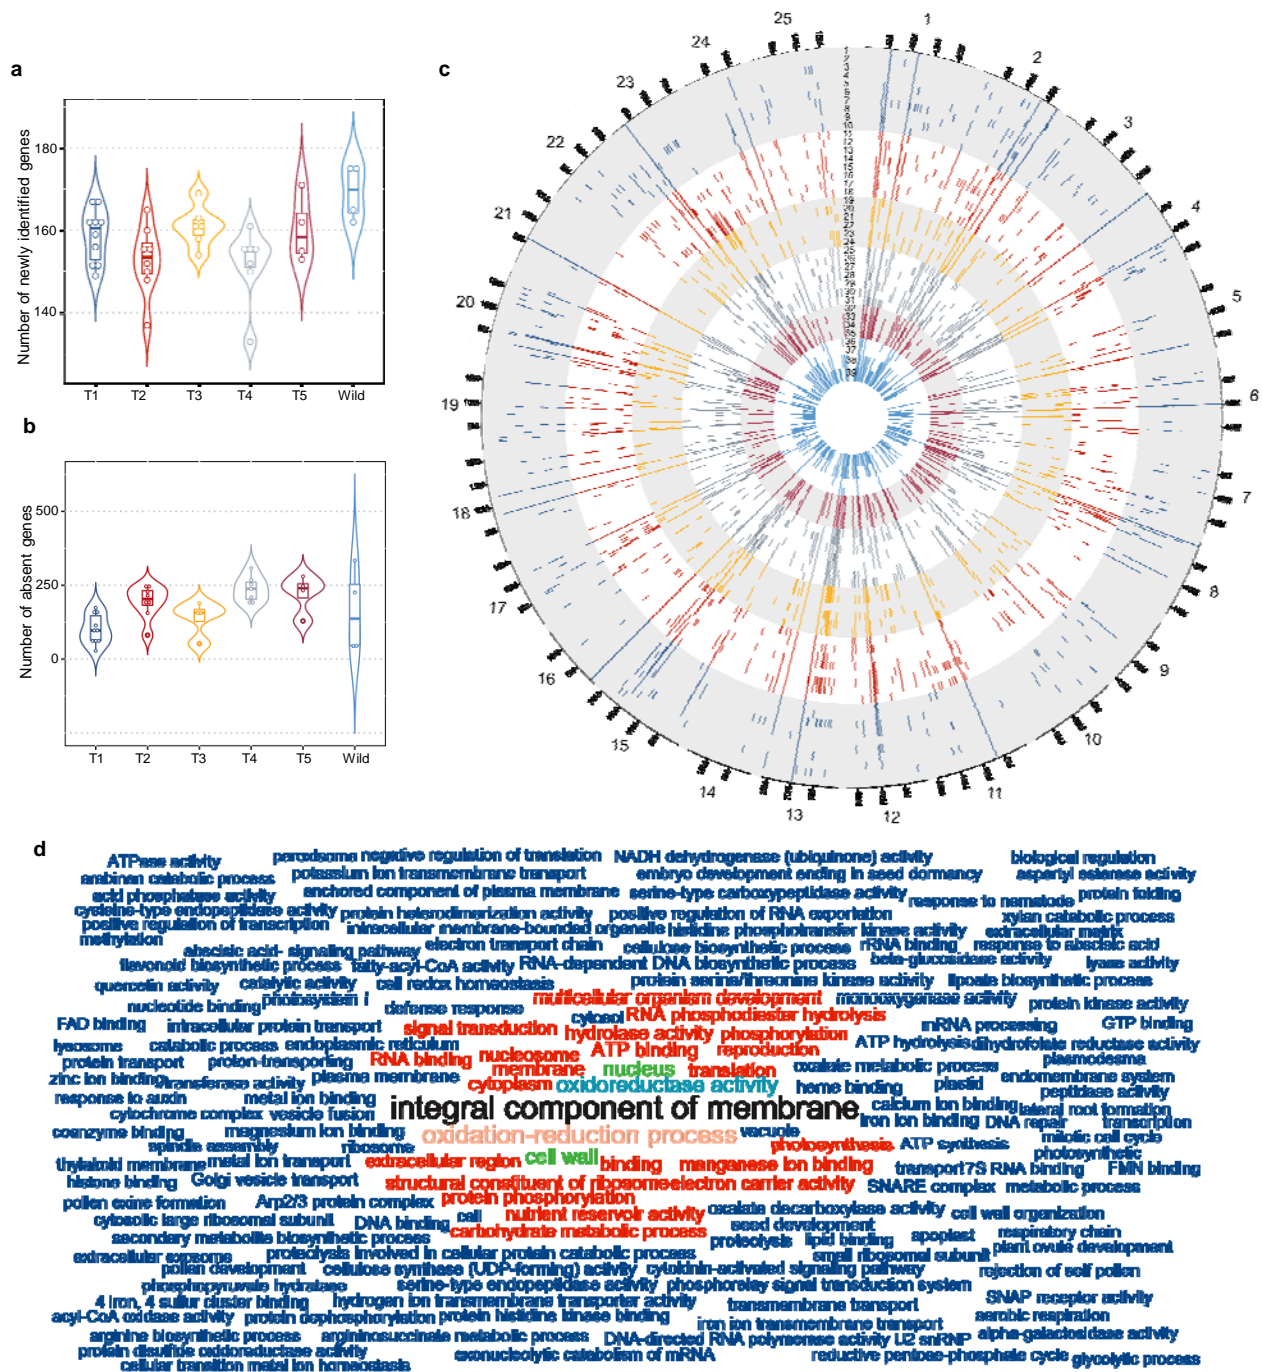

**Figure 3. PAV of coding gene in *L. albus*.** (a) Number of newly identified genes by phylogenetic group. (b) Number of absent genes by phylogenetic groups. (c) Positioning of absent genes in the 25 white lupin chromosomes in each one of the 39 accessions. Order of accessions from outer to inner track: 1-AMIGA, 2-FEODORA, 3-FIGARO, 4-ENERGY, 5-KIEV MUTANT, 6-HANSA, 7-P21525, 8-PRIMORSKY, 9-DIETA, 10-VOLODIA, 11-START, 12-N3507, 13-TOMBOWSKIJ, 14-KALINA, 15-SYR6258B, 16-LUCKY, 17-MURRINGO, 18-SHINFIELD, 19-ALB01, 20-LUXE, 21-ULYSSE, 22-MAGNUS, 23-CLOVIS, 24-ORUS, 25-NAHRQUELL, 26-GYUNLATANYA, 27-NEULAND, 28-NEUTRA, 29-BADAJOS, 30-EGY6484B, 31-POUTIGANO, 32-P27174, 33-GERELTA, 34-DOGAN, 35-WADO, 36-GR38, 37-GRAECUS, 38-BATSI, 39-GRC5262B. The accessions' colors reflect the 6 idiotypes. (d) Functional enrichment analysis of the variable genome. Graphical representation of enriched biological process (GOs). Size of the words and colors are proportional to their representativeness in the gene pool.

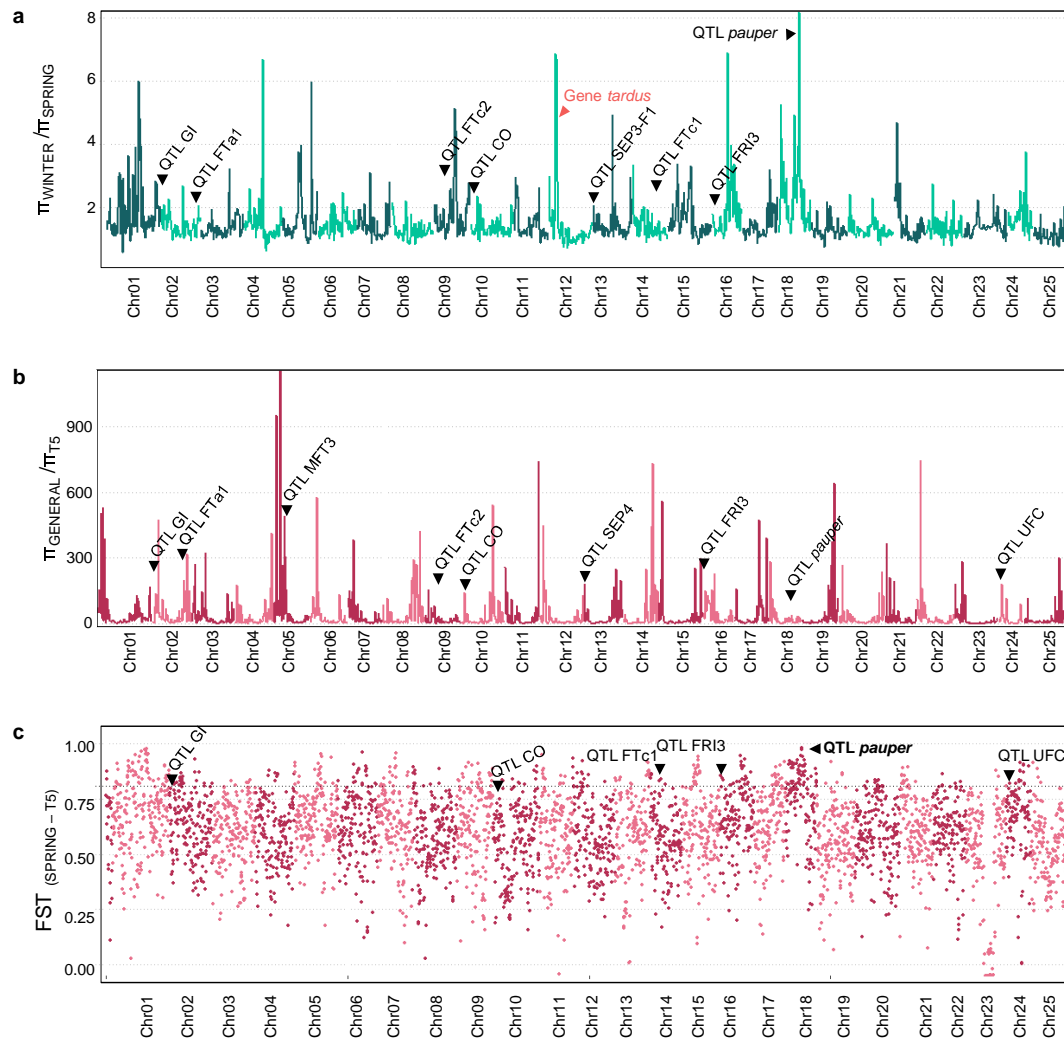

**Figure 4. Footprints of selection in the white lupin genome.** Nucleotide diversity ( $\pi$ ) comparison between **(a)** Winter (T3 and T4) and Spring accessions (T1 and T2) and **(b)** between all accessions (General) and Ethiopian accessions (T5). QTLs previously reported and a *L. angustifolius* domestication gene (red) that overlapped with selective sweeps are marked. **(c)**  $F_{ST}$ -based genome-wide analysis of population differentiation estimated between Spring (T1 and T2) and Ethiopian (T5) accessions. Black horizontal dashed line marks the .90 percentile of distribution of  $F_{ST}$  estimated ( $F_{ST} = 0.81$ ).

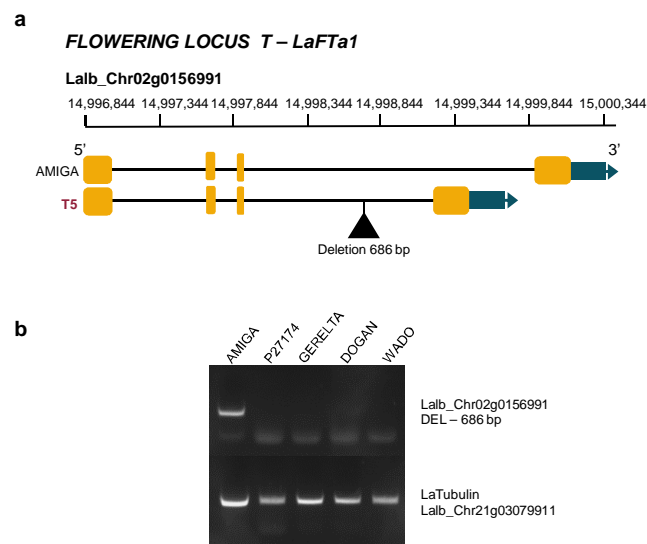

**Figure 5. Identification and allele variation of candidate gene *FLOWERING LOCUS T*.** (a) Candidate gene located on chromosome 2. Type 5 accessions, originated from Ethiopia, have a deletion of 686 bp in the third intron. (b) Confirmation of the deletion in the third intron of Type 5 accession by PCR. Gene *LaTubulin* was used as positive control.
